# Supplementary figures and images for: IL1R2 increases regulatory T cell population in the tumor microenvironment by enhancing MHC-II expression on cancer-associated fibroblasts
Source: HighWire-hosted journal article supplement (doi:10.1136/jitc-2022-004585), 2022-09-01

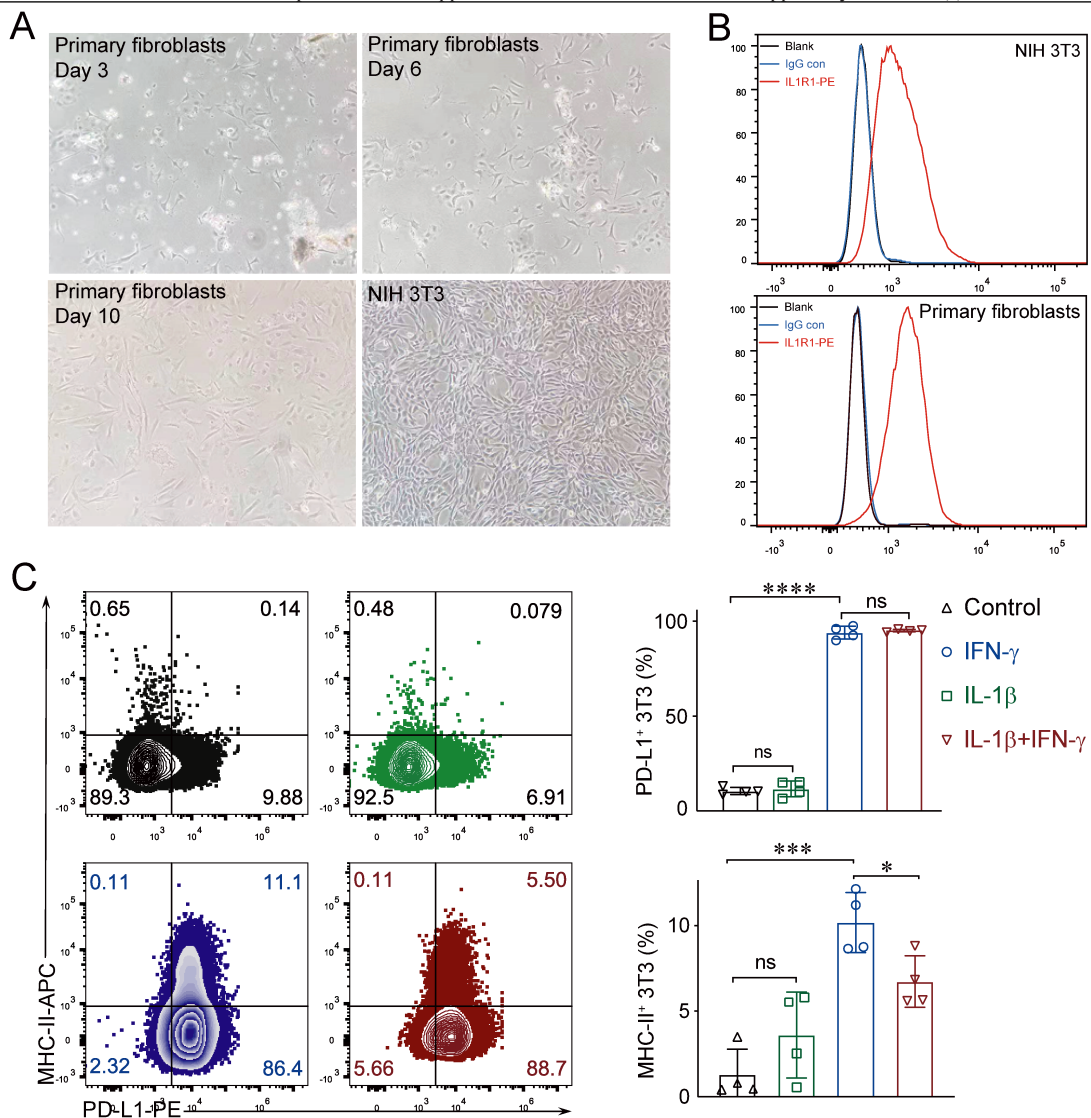

Supplement: jitc-2022-004585supp007_data_supplement.pdf [file jitc-2022-004585supp007_data_supplement.pdf]
